# Supplementary material for: The composition effect on the optical properties of aqueous synthesized Cu–In–S and Zn–Cu–In–S quantum dot nanocrystals
Source: Royal Society of Chemistry journal article supplement (doi:10.1039/c5cp03312h), 2015-01-01
Supplement: c5cp03312h1.pdf [file c5cp03312h1.pdf]

## Supporting Information

# Composition effect on the optical properties of the aqueous synthesized Cu-In-S and Zn-Cu-In-S quantum dot nanocrystals

*Butian Zhang,<sup>a‡</sup> Yucheng Wang,<sup>a‡</sup> Chengbin Yang,<sup>a</sup> Siyi Hu,<sup>b</sup> Yuan Gao,<sup>a</sup> Yiping Zhang,<sup>a</sup> Yue Wang,<sup>b</sup> Hilmi Volkan Demir,<sup>a</sup> Liwei Liu,<sup>b</sup> and Ken-Tye Yong<sup>a</sup>*

<sup>a</sup> School of Electrical and Electronic Engineering, Nanyang Technological University, Singapore 639798, Singapore Email: [ktyong@ntu.edu.sg](mailto:ktyong@ntu.edu.sg)

<sup>b</sup> Changchun University of Science and Technology, Changchun, Jilin 130022, PR China

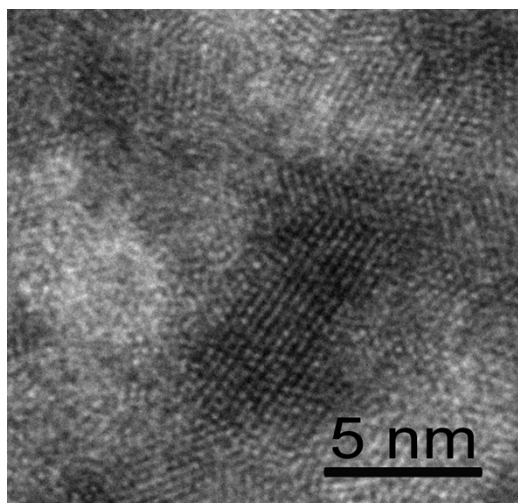

Figure S1. High resolution TEM image of Cu-In-S QDs with a Cu:In ratio of 0.6.

|                   | Feed ratio (MPA excluded) |        |        |      | EDX results      |                  |                  |                  |
|-------------------|---------------------------|--------|--------|------|------------------|------------------|------------------|------------------|
|                   | Zn(%)                     | Cu(%)  | In(%)  | S(%) | Zn(%)            | Cu(%)            | In(%)            | S(%)             |
| <b>0%ZnCuInS</b>  | 0                         | 18.75  | 31.25  | 50   | $0.00 \pm 0.00$  | $18.62 \pm 2.44$ | $32.83 \pm 2.50$ | $48.55 \pm 3.65$ |
| <b>10%ZnCuInS</b> | 5                         | 16.875 | 28.125 | 50   | $5.07 \pm 0.26$  | $15.74 \pm 0.33$ | $25.20 \pm 5.84$ | $53.99 \pm 6.29$ |
| <b>30%ZnCuInS</b> | 15                        | 13.125 | 21.875 | 50   | $14.25 \pm 5.04$ | $10.36 \pm 2.38$ | $19.97 \pm 0.78$ | $55.43 \pm 6.50$ |
| <b>50%ZnCuInS</b> | 25                        | 9.375  | 15.625 | 50   | $18.83 \pm 3.09$ | $6.08 \pm 0.59$  | $14.32 \pm 1.34$ | $60.77 \pm 4.08$ |
| <b>70%ZnCuInS</b> | 35                        | 5.625  | 9.375  | 50   | $25.49 \pm 0.45$ | $2.83 \pm 0.68$  | $9.17 \pm 0.82$  | $62.51 \pm 1.19$ |

Table S1. The feed ratio of Zn, Cu, In, S in reaction mixtures and the EDX determined composition ratio in prepared ZCIS QDs.

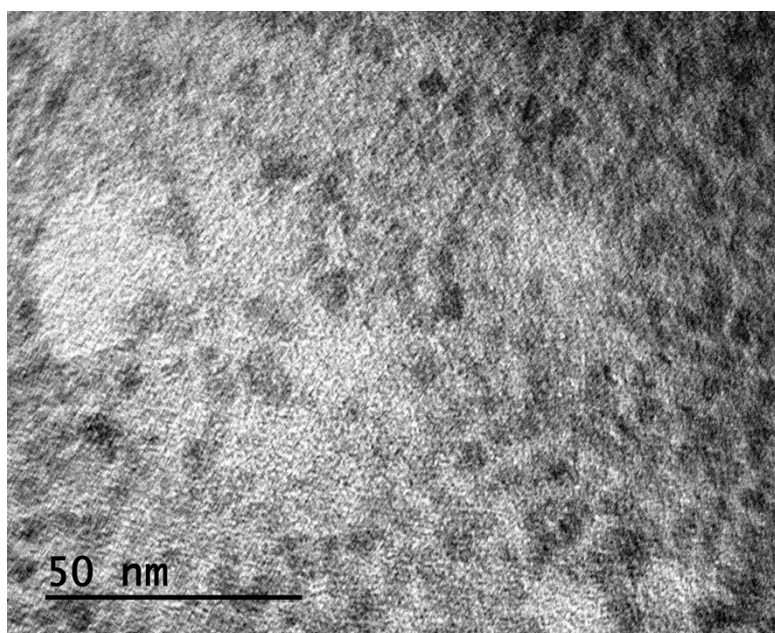

Figure S2. TEM image of 70% ZCIS QDs.

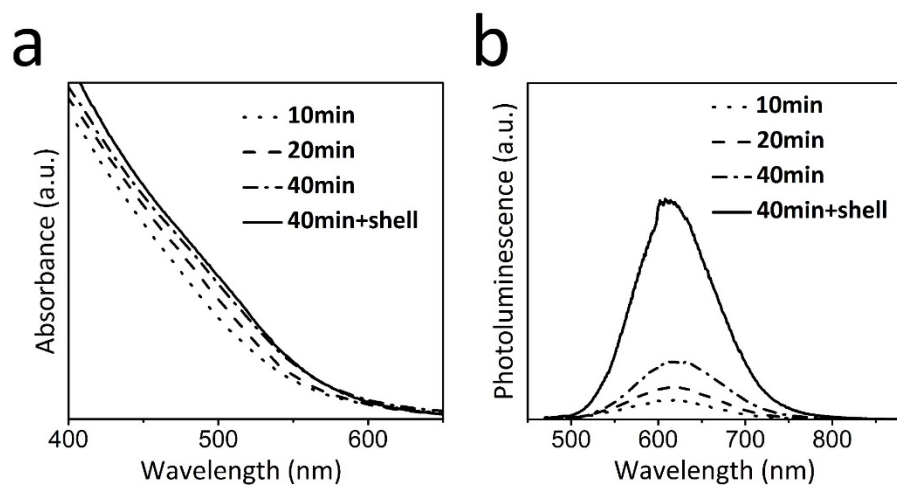

Figure S3. Temporal evolution of (a) absorption and (b) photoluminescence spectra in a growth reaction of ZCIS/ZnS QDs.

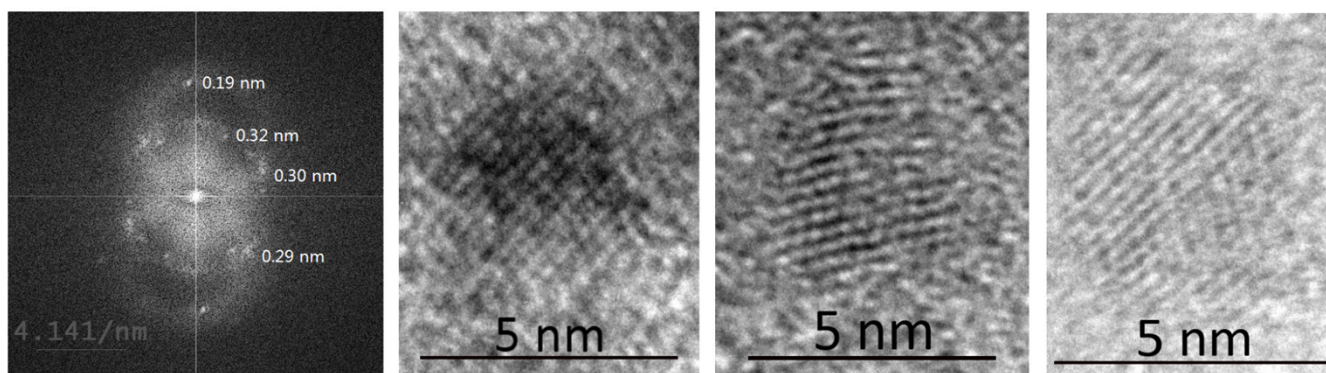

Figure S4. FFT pattern and TEM images of 30% ZCIS/ZnS QDs.

| Samples     | A1      | t1 (ns) | A2      | t2 (ns)  | Average lifetime (ns) |
|-------------|---------|---------|---------|----------|-----------------------|
| CIS/ZnS     | 0.14537 | 5.08986 | 0.85463 | 191.0669 | 161.0515              |
| 10%ZCIS/ZnS | 0.21174 | 4.83501 | 0.78826 | 144.3757 | 110.0229              |
| 50%ZCIS/ZnS | 0.27424 | 3.50362 | 0.72576 | 131.0161 | 89.01911              |

Table S2. The decay constants of the fitted luminescence decay curves. The fitting formula is  $y=A1*\exp(-t/t1)+A2*\exp(-t/t2)$ , in which  $A1+A2=1$ .

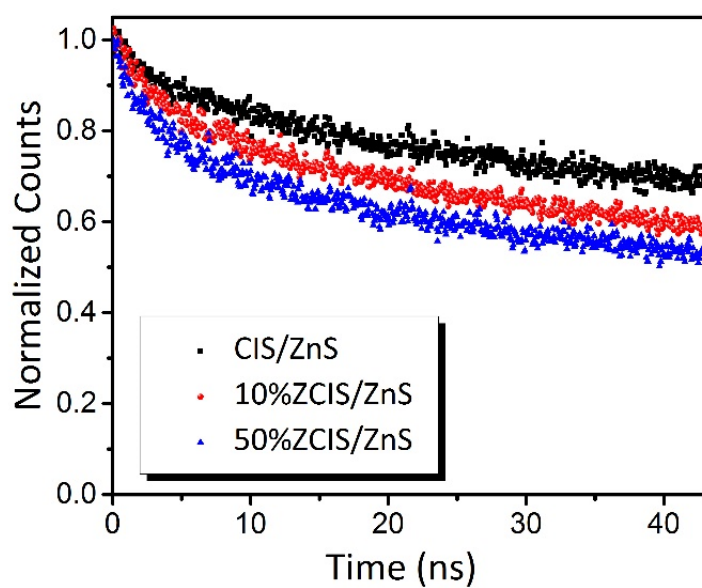

Figure S5. Luminescence decay curves of the 0%, 10% and 50% ZCIS/ZnS QDs in water.

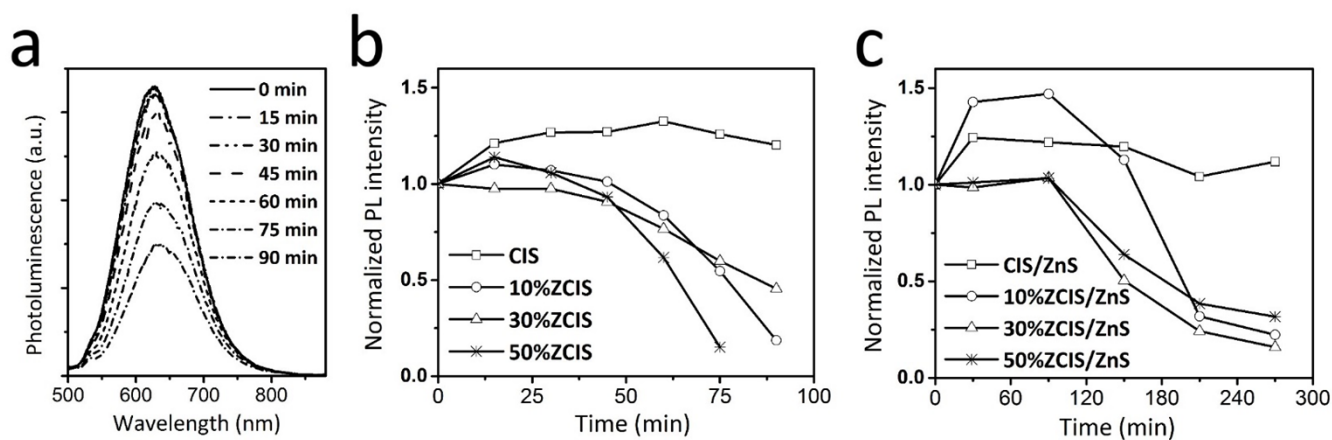

Figure S6. Photostability studies of ZCIS and ZCIS/ZnS QDs. (a) Temporal evolution of photoluminescence spectra of 30% ZCIS QDs under UV irradiation. (b) and (c) PL maximum change of ZCIS and ZCIS/ZnS QDs during different UV irradiation times.
